# Supplementary material for: A new colorimetric fluorescent sensor for ratiometric detection of cyanide in solution, test strips, and in cells
Source: Royal Society of Chemistry journal article supplement (doi:10.1039/c3ra46741d), 2014-01-01
Supplement: c3ra46741d.pdf [file c3ra46741d.pdf]

## Electronic Supplementary Information (ESI)

### New colorimetric fluorescent sensor for ratiometric detection of cyanide in solution, paper strips, and in cells

Mingda Sun, Shaodan Wang,<sup>a</sup> Qingbiao Yang\* Xiaoliang Fei,<sup>a</sup> Yaoxian Li,<sup>a</sup> and Yapeng Li\*

<sup>a</sup> Department of Chemistry, Jilin University, Changchun, 130021, People's Republic of China.

## CONTENTS

### 1. Synthesis of Probe Phc.

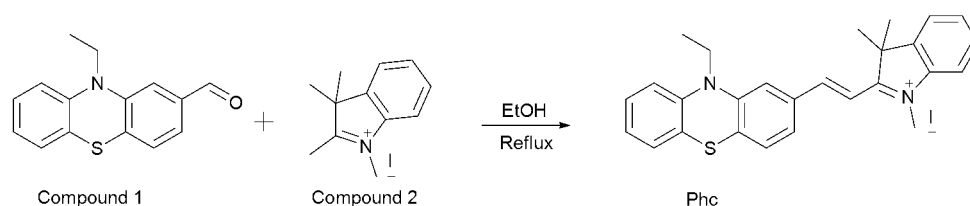

**Compound 1** was prepared according the reported procedure.<sup>S1</sup> **Compound 2** was purchased from Sigma-Aldrich. For the preparation of **Phc compound**, compound 1 (0.255 g, 1.0 mmol) and compound 2 (0.301 g, 1.0 mmol) were dissolved in 20 ml ethanol. The reaction mixture was refluxed with stirring for 12 h and then evaporated

in vacuum. The residue was purified by column chromatography on silica gel (CH<sub>2</sub>Cl<sub>2</sub> / ethanol, 10:1 v/v) to give Phc (0.197 g) as a dark blue solid.<sup>S2</sup> Yield, 48%. <sup>1</sup>H NMR (600MHz, CDCl<sub>3</sub>) δ 8.5(m, 1H), 8.1(d, 1H), 7.5(m, 5H), 7.2(d, 1H), 7.1(d, 1H), 7.0(m, 3H), 4.4(s, 3H), 4.0(q, 2H), 1.8(s, 6H), 1.5(t, 3H); <sup>13</sup>C NMR (150 MHz, CDCl<sub>3</sub>) δ 181.03, 153.36, 150.25, 142.62, 141.94, 141.55, 129.57, 129.52, 129.16, 128.10, 127.72, 127.31, 123.96; HRMS (positive mode, m/z): Calcd. 255.0718, found 255.0725 for [M + H]<sup>+</sup>.

**The Phc-CN compound** could be conveniently synthesized via the condensation of Phc and 2 equiv. of (CH<sub>3</sub>CH<sub>2</sub>CH<sub>2</sub>CH<sub>2</sub>)<sub>4</sub>N(CN) in ethanol at room temperature (yield: 95%), and purified by column chromatography on silica gel (CH<sub>2</sub>Cl<sub>2</sub>) as a pale green color. Note: the product is very unstable, and will decompose when exposed in the air. <sup>1</sup>H NMR (600MHz, CDCl<sub>3</sub>) δ 7.3 (s, 3H), 7.2 (m, 1H), 7.2 (d, 1H), 7.1 (dd 1H), 7.1 (d, 1H), 7.0 (m, 1H), 6.9 (m, 3H), 6.6 (d, 1H), 6.1 (d, 1H) 4.0 (q, 2H), 2.8 (s, 3H), 1.6 (d, 6H), 1.5 (t, 3H); <sup>13</sup>C NMR (150 MHz, CDCl<sub>3</sub>) δ 148.62, 145.30, 144.35, 136.60, 134.88, 128.29, 127.42, 127.40, 126.70, 125.00, 122.64, 120.28, 115.13, 114.93, 108.84, 80.47, 49.14, 45.85, 41.96, 31.58, 24.51, 23.01, 12.94; HRMS (positive mode, m/z): Calcd. 437.1926, found 438.1935 for [M + H]<sup>+</sup>.

## References

[S1] WANG Wei, ZHANG Ying-mu, LI Yao-xian, ZHAO Qing, Chem. Res. Chin. Univ. 2013, 29 (4), 632–637.

[S2] Xin Lv, Jing Liu, Yunlong Liu, Yun Zhao, Yuan-Qiang Sun, Pi Wang and Wei Guo,

Chem. Commun., 2011, 47, 12843–12845.

## 2. Characterization of the compounds.

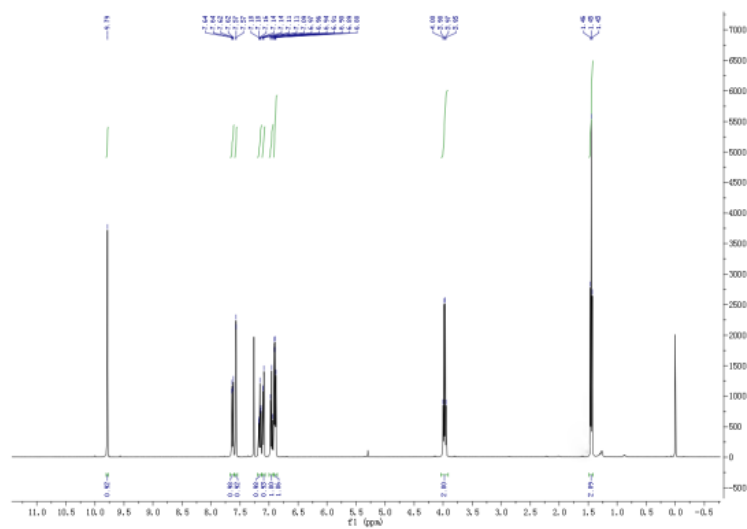

**Fig. S1**  $^1\text{H}$  NMR spectrum of Compound 1 in  $\text{CDCl}_3$ .

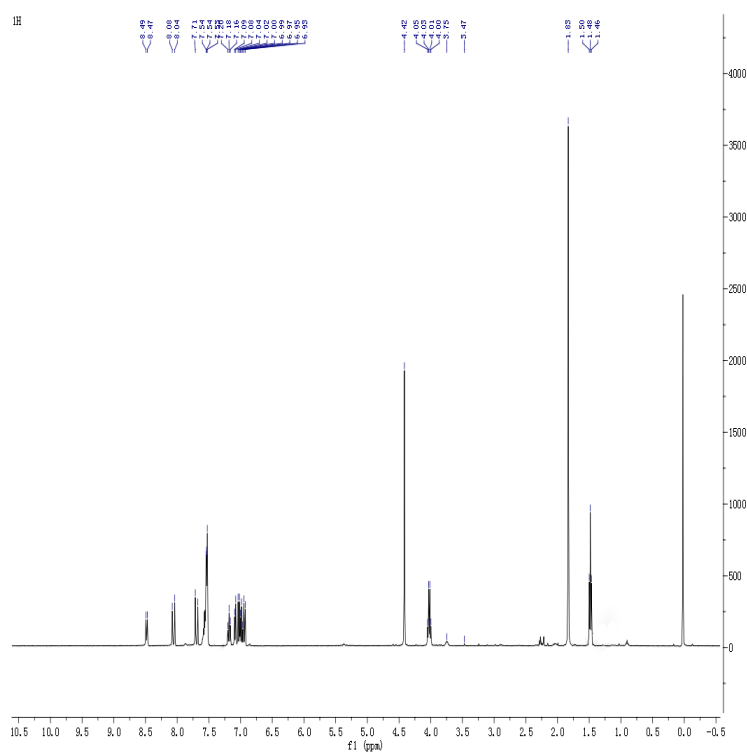

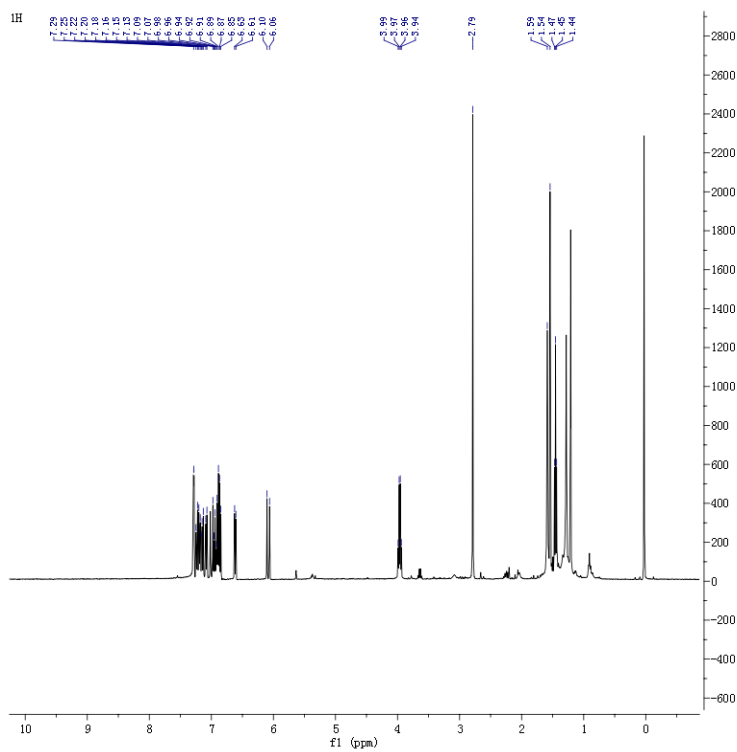

**Fig. S2**  $^1\text{H}$  NMR charts of Phc in  $\text{CDCl}_3$  (top) and Phc-CN $^+$  in  $\text{CDCl}_3$  (below), respectively.

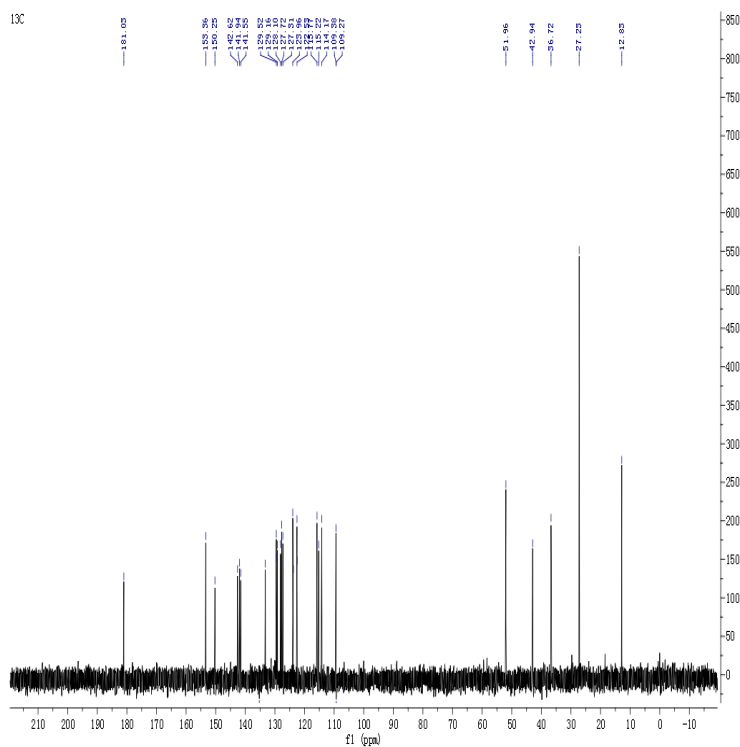

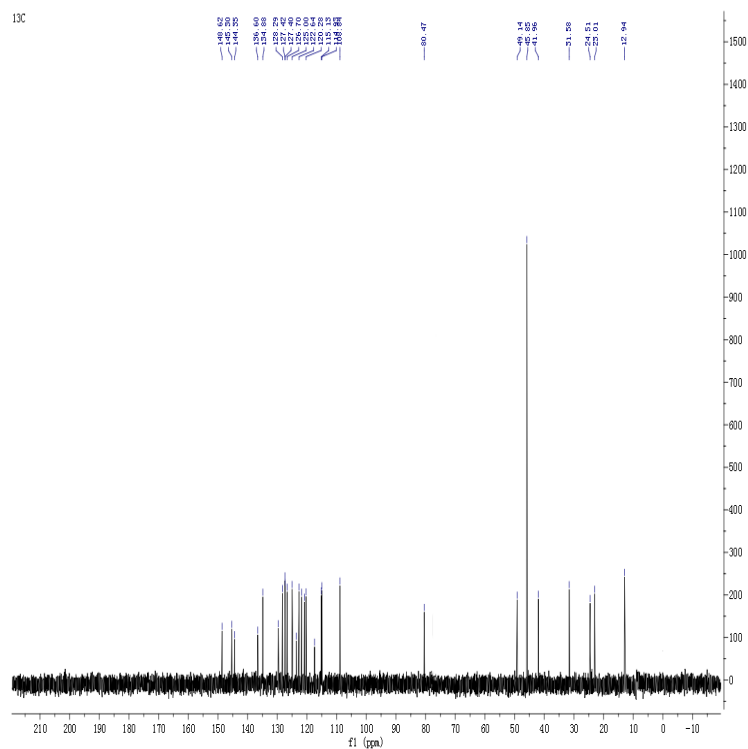

**Fig. S3**  $^{13}\text{C}$  NMR charts of Phc in  $\text{CDCl}_3$  (top) and Phc-CN $^-$  in  $\text{CDCl}_3$  (below), respectively.

### 3. Supplemental spectra

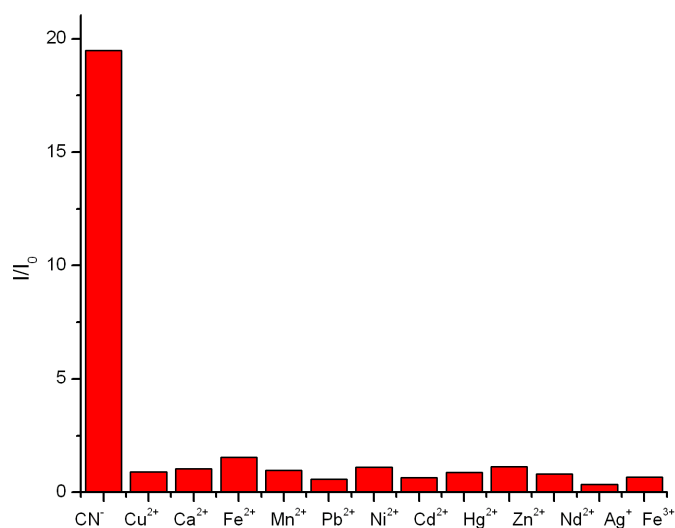

**Fig. S4** Variation of the relative fluorescence intensity at 488 nm of Phc (10.0  $\mu\text{M}$ ) in the presence of CN $^-$  (35.0  $\mu\text{M}$ ) and metal cations ( $\text{Cu}^{2+}$ ( $\text{Cu}(\text{ClO}_4)_2$ ) /  $\text{Zn}^{2+}$ ( $\text{Zn}(\text{ClO}_4)_2$ )/ $\text{Ca}^{2+}$ ( $\text{Ca}(\text{ClO}_4)_2$ )/ $\text{Fe}^{2+}$ ( $\text{Fe}(\text{ClO}_4)_2$ )/ $\text{Ni}^{2+}$ ( $\text{Ni}(\text{ClO}_4)_2$ )/ $\text{Mn}^{2+}$ ( $\text{Mn}(\text{ClO}_4)_2$ )/ $\text{Pb}^{2+}$ ( $\text{Pb}(\text{ClO}_4)_2$ )/ $\text{Cd}^{2+}$ ( $\text{Cd}(\text{ClO}_4)_2$ ) / $\text{Hg}^{2+}$ ( $\text{Hg}(\text{ClO}_4)_2$ )/ $\text{Nd}^{2+}$ ( $\text{Nd}(\text{ClO}_4)_2$ )/ $\text{Ag}^+$ ( $\text{AgClO}_4$ )/ $\text{Fe}^{3+}$ ( $\text{Fe}(\text{ClO}_4)_3$ ), the concentration of each metal cations was 350  $\mu\text{M}$ ; all solutions were excited at 350 nm, Slits: 5 nm/ 5 nm.

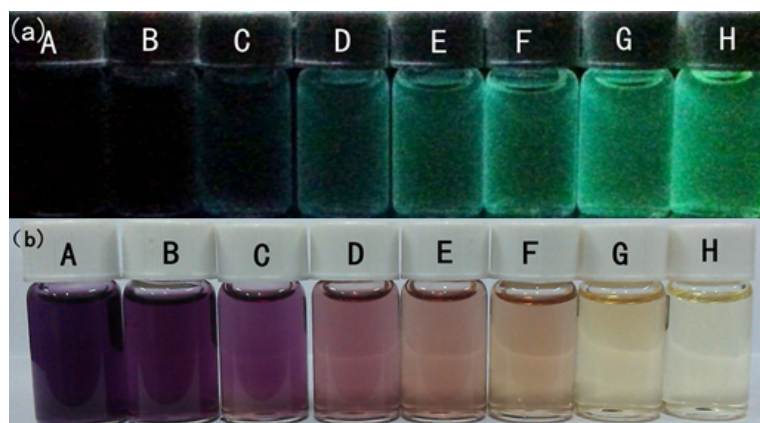

**Fig. S5** From left to right (A-H) are photographs under fluorescence and visible light of Phc(10 $\mu$ M) with the addition of CN<sup>-</sup> (0-3.5 equiv.; 0 equiv., 0.5 equiv., 1 equiv., 1.5 equiv., 2 equiv., 2.5 equiv., 3 equiv., 3.5 equiv.).

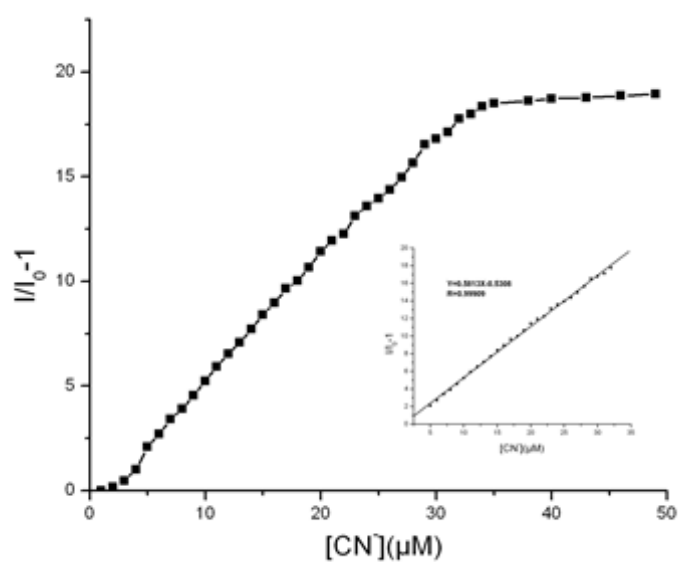

**Fig. S6**  $I/I_0 - 1$  intensity vs.  $[CN^-]$  plot with corresponding linear fit analysis data.

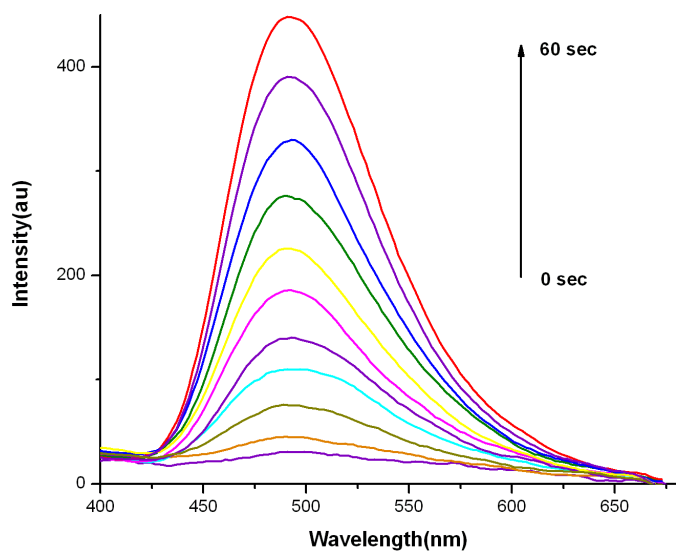

**Fig. S7** Time-dependent fluorescence changing of Phc (10 μM).

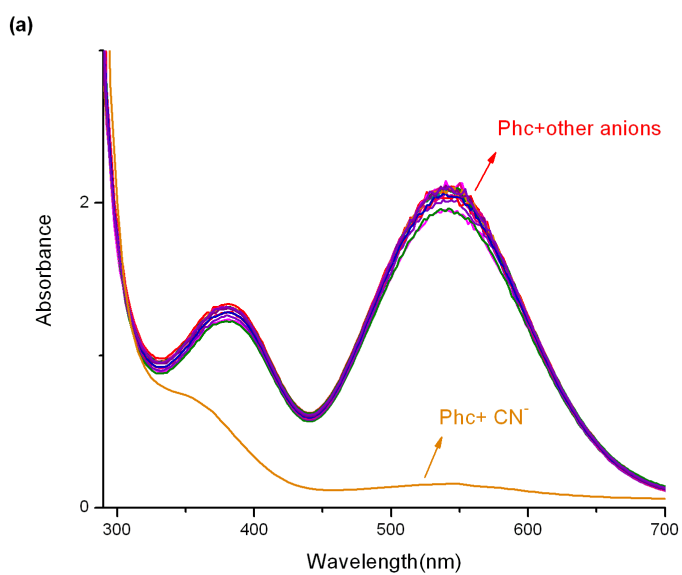

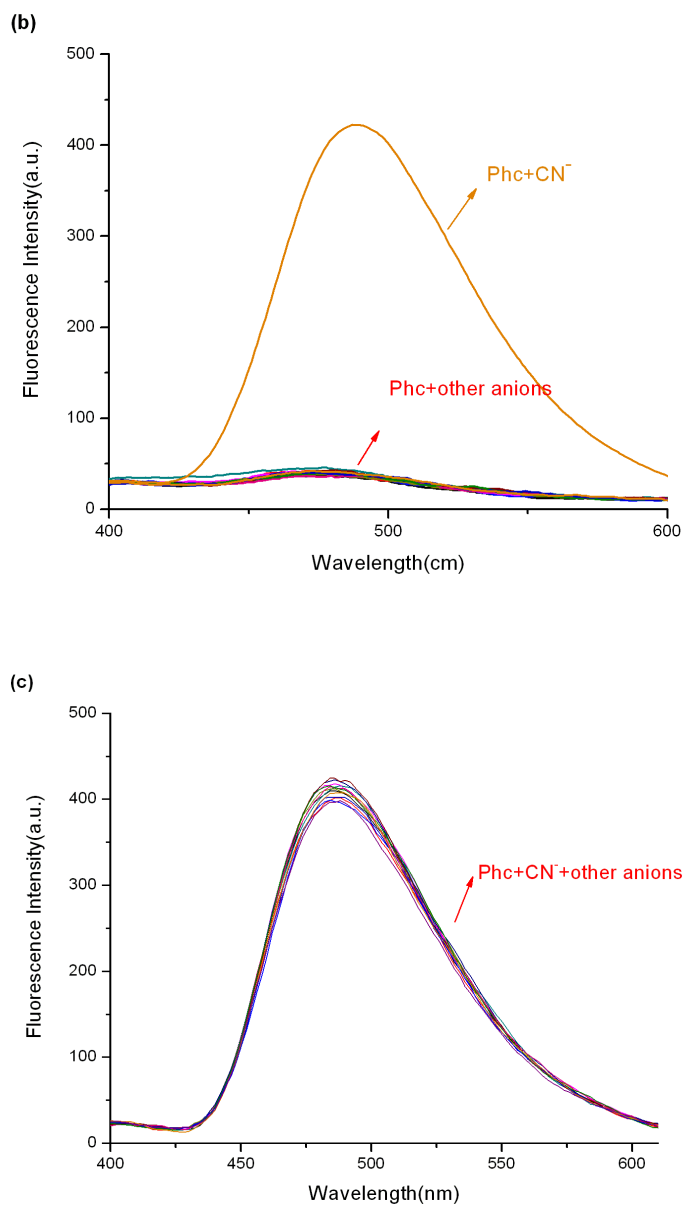

**Fig. S8** (a) Absorption spectra of Phc (100  $\mu$ M) and (b) fluorescence spectra of Phc (10  $\mu$ M) in the presence of anions (35 equiv.); (c) Fluorescence spectra of Phc (10  $\mu$ M) with CN<sup>-</sup> (3.5 equiv.) in the addition of other anions (CN<sup>-</sup>, F<sup>-</sup>, Cl<sup>-</sup>, Br<sup>-</sup>, I<sup>-</sup>, N<sub>3</sub><sup>-</sup>, SCN<sup>-</sup>, NO<sub>3</sub><sup>-</sup>, EDTA, CH<sub>3</sub>COO<sup>-</sup>, H<sub>2</sub>PO<sub>4</sub><sup>-</sup>, HSO<sub>3</sub><sup>-</sup>, HPO<sub>4</sub><sup>2-</sup>, SO<sub>4</sub><sup>2-</sup>).

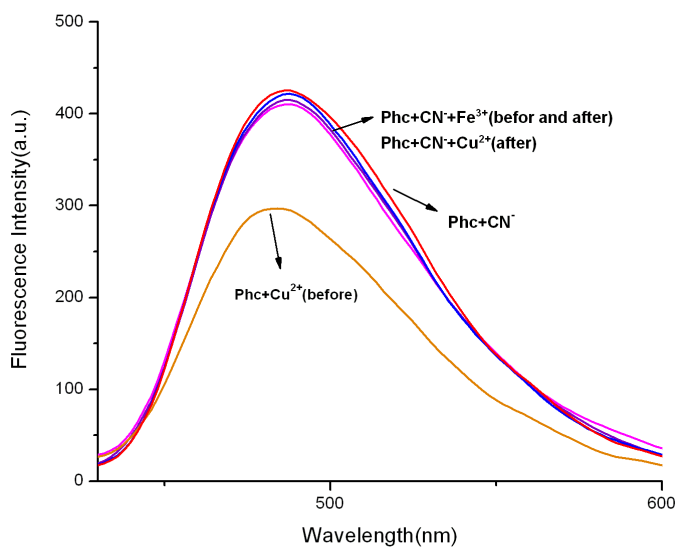

**Fig. S9** Fluorescence spectra of Phc (10  $\mu\text{M}$ ) with  $\text{CN}^-$  (3.5equiv.) in the presence of  $\text{Fe}^{3+}$  and  $\text{Cu}^{2+}$ .

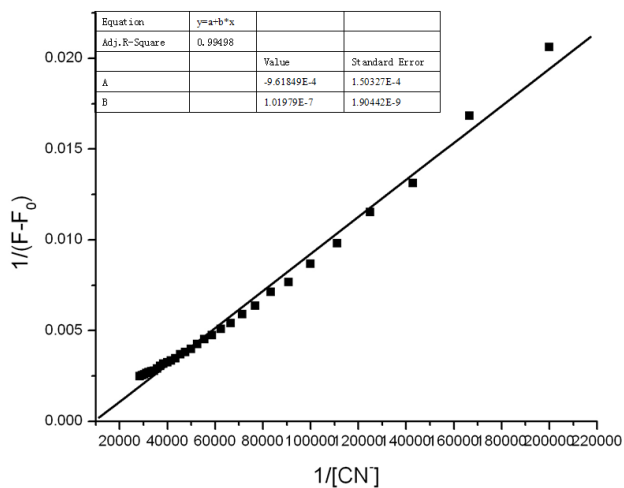

**Fig. S10** Benesi-Hildebrand plot from emission titration data of Phc (10  $\mu\text{M}$ ) with  $\text{CN}^-$ .

The Benesi-Hildebrand equation:  $1/(F-F_0) = 1/\{K_a(F_{\text{max}}-F_0) [\text{CN}^-]_n\} + 1/[F_{\text{max}}-F_0]$

Here  $F_0$  is the fluorescence of the sensor in the absence of  $\text{CN}^-$ ,  $F$  is the fluorescence recorded in the presence of added guest,  $F_{\text{max}}$  is the fluorescence in presence of added  $[\text{CN}^-]_{\text{max}}$ ,  $K_a$  is the association constant.
